# Supplementary material
Source: PubMed Central journal article supplement (PMC11457535)
Supplement: NIHMS2023351-supplement-SI.pdf [file NIHMS2023351-supplement-SI.pdf]

## Supporting Information

### Interrogating the role of endocytosis pathway and organelle trafficking for Doxorubicin-based combination Ionic Nanomedicines

Mujeebat Bashiru,<sup>1</sup> Muhammad Rayaana,<sup>1</sup> Nawab Ali,<sup>2</sup> Samir V. Jenkins,<sup>3</sup> Adeniyi Oyebade,<sup>1</sup> Md Shahedur Rahman,<sup>1</sup> Robert J. Griffin,<sup>3</sup> Adegboyega K Oyelere,<sup>4</sup> Noureen Siraj\*<sup>1</sup>

<sup>1</sup>*Department of Chemistry, University of Arkansas at Little Rock, Little Rock, AR 72204, USA.*

<sup>2</sup>*Department of Biology, University of Arkansas at Little Rock, Little Rock, AR 72204, USA.*

<sup>3</sup>*University of Arkansas for Medical Sciences, Winthrop P. Rockefeller Cancer Institute, Arkansas Nanomedicine Center, Department of Radiation Oncology, 4301 W Markham St, Little Rock, AR 72205, USA.*

<sup>4</sup>*School of Chemistry and Biochemistry, Parker H. Petit Institute for Bioengineering and Bioscience, Georgia Institute of Technology, Atlanta, Georgia 30332, USA.*

**Corresponding author:** [nxsiraj@ualr.edu](mailto:nxsiraj@ualr.edu)

**Table S1.** Different endocytosis inhibitors and their concentrations

| Endocytosis inhibitor | Concentration |
|-----------------------|---------------|
| Chlorpromazine        | 21.9 $\mu$ M  |
| Filipin               | 4.6 mM        |
| Sucrose               | 0.3 mM        |
| Chloroquine           | 100 $\mu$ M   |
| AEBSF                 | 0.5 mM        |
| Imipramine            | 5 $\mu$ M     |
| M $\beta$ CD          | 2.5 $\mu$ M   |
| Amiloride             | 12.6 $\mu$ M  |

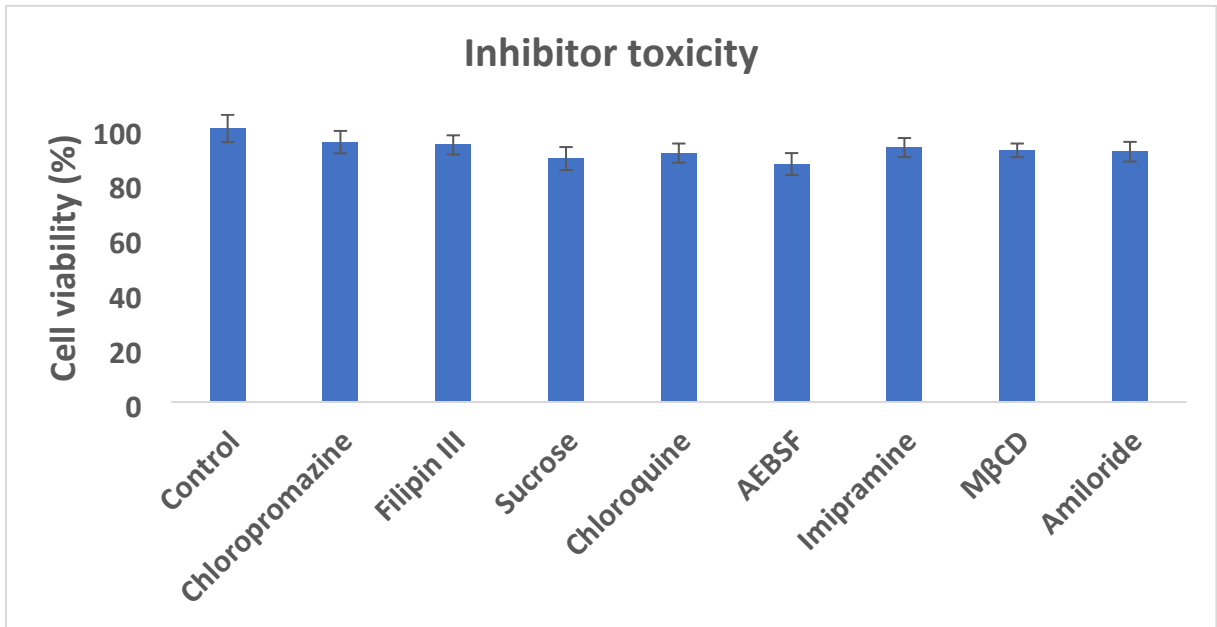

**Figure S1.** Cell viability endocytic inhibitors in MCF-7 cells pre-incubated for 2 hr at 37 °C prior to cell media introduction for 24 hr. Inhibitor concentrations are reported in Table S1 above. The results are represented as mean  $\pm$  SD (n=3), statistically significant  $p \leq 0.05$  (\*) was evaluated using the student t-test.

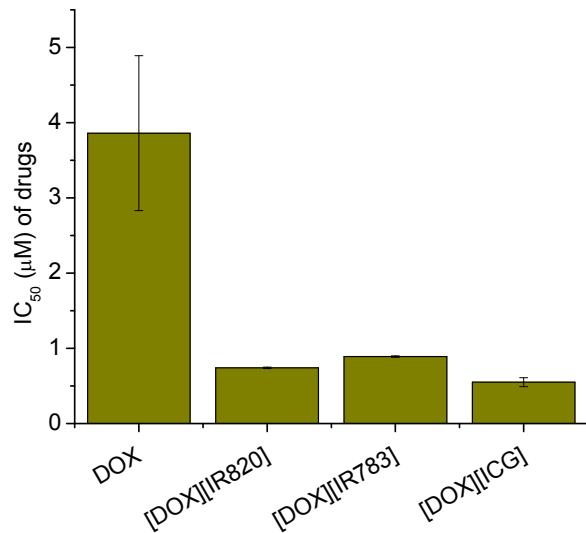

**Figure S2:** Bar graphs representing the IC<sub>50</sub> values for DOX and three chemo-PTT combination INMs on MCF-7 cells incubated for 24 hr. Bar graph obtained from IC<sub>50</sub> values generated from previous findings.<sup>[5]</sup>

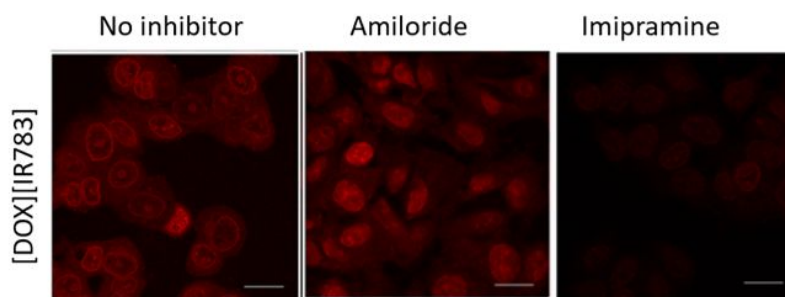

**Figure S3.** Confocal microscopy images of MCF-7 cells treated with [DOX][IR783] INMs in the presence of macropinocytosis inhibitors introduced at 5 µM and 12.6 µM for amiloride and imipramine. Scale bar represents 10 µm.

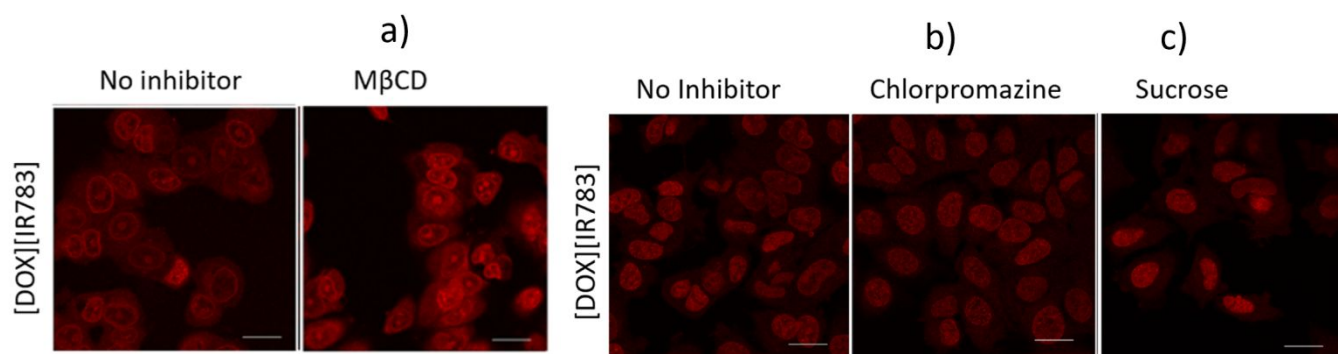

**Figure S4.** Confocal microscopy images of CME-related inhibitor treated MCF-7 cells incubated with [DOX][IR783] INMs. a) M $\beta$ CD b) chlorpromazine c) sucrose. M $\beta$ CD, chlorpromazine and sucrose introduced at 2.5  $\mu$ M, 21.9  $\mu$ M and 0.3 mM respectively. Scale bar represents 10 $\mu$ m.

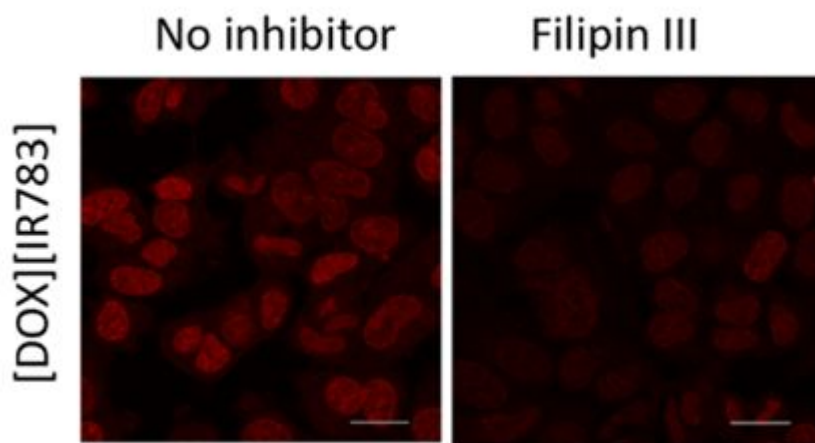

**Figure S5.** Confocal microscopy images of [DOX][IR783] INMs treated MCF-7 cells in the presence of filipin III at 4.6 mM. Scale bar represents 10  $\mu$ m.

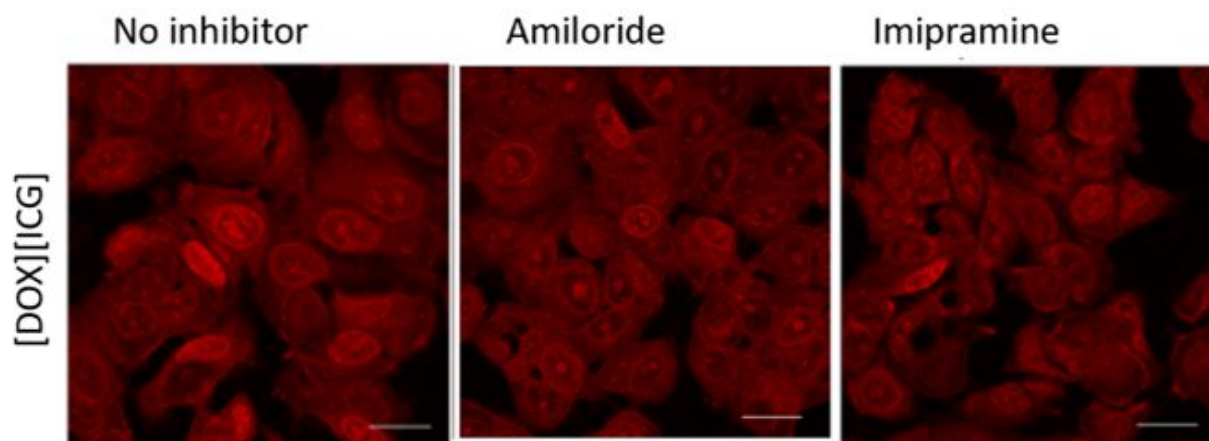

**Figure S6.** Confocal microscopy images of MCF-7 cells treated with [DOX][ICG] INMs pre-treated with macropinocytosis inhibitors introduced at a concentration of 5  $\mu$ M for amiloride and 12.6  $\mu$ M for imipramine. Scale bar represents 10  $\mu$ m.

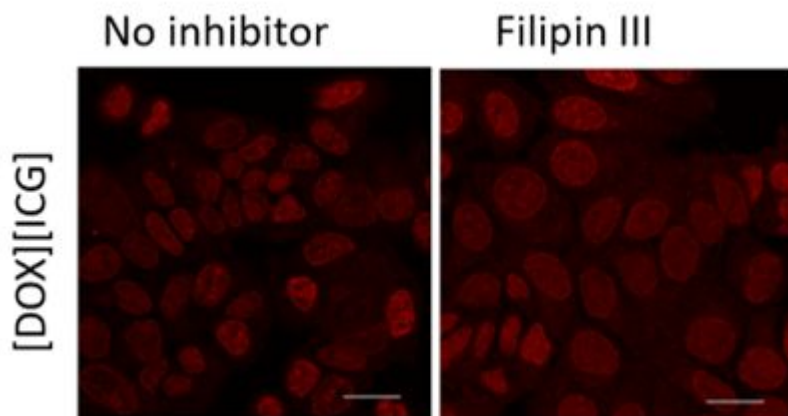

**Figure S7.** Confocal microscopy images of [DOX][ICG] INMs treated MCF-7 cells in the presence of Filipin III inhibitor introduced at 4.6 mM. Scale bar represents 10  $\mu$ m.

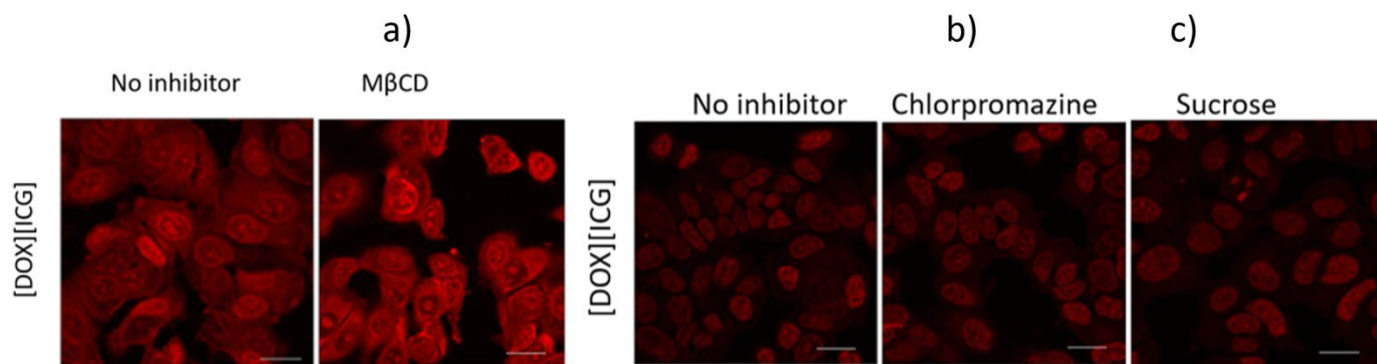

**Figure S8.** Confocal microscopy images of CME-related inhibitor treated MCF-7 cells incubated with [DOX][ICG] INMs. a) MβCD b) chlorpromazine c) sucrose. MβCD, chlorpromazine and sucrose introduced at 2.5 μM, 21.9 μM and 0.3 mM respectively. Scale bar represents 10 μm.

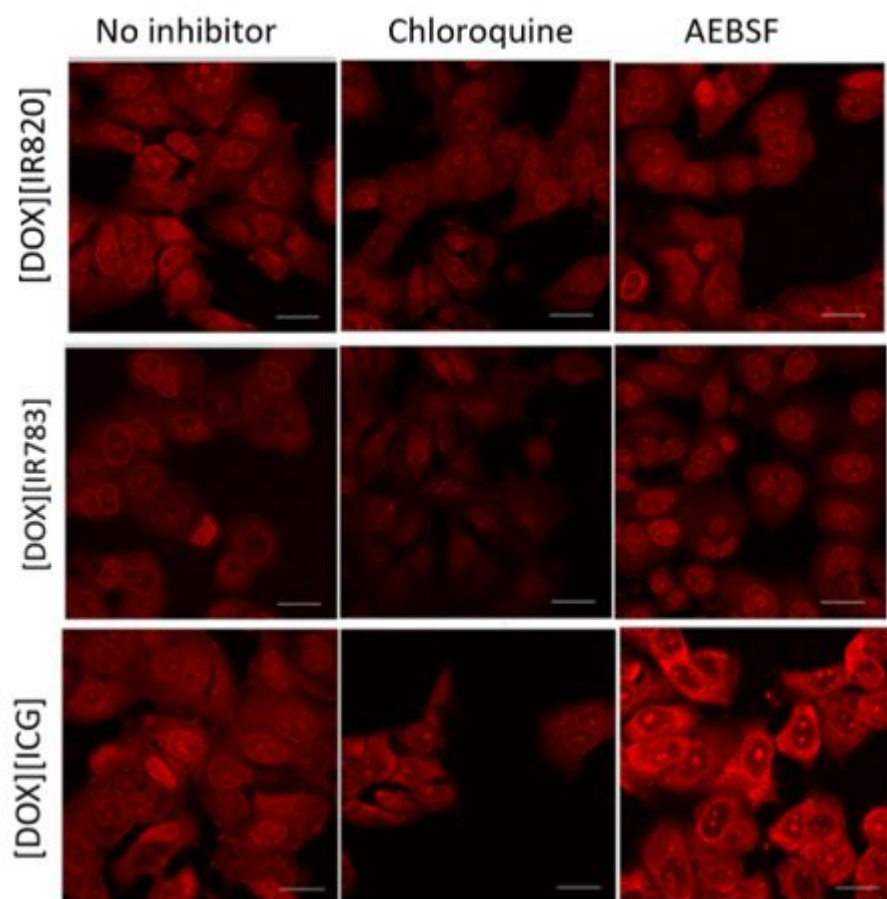

**Figure S9.** Confocal microscopy images of [DOX][IR820], [DOX][IR783] and [DOX][ICG] INMs pre-treated separately with chloroquine and AEBSF at 100  $\mu$ M and 0.5 mM respectively. Scale bar represents 10  $\mu$ m.

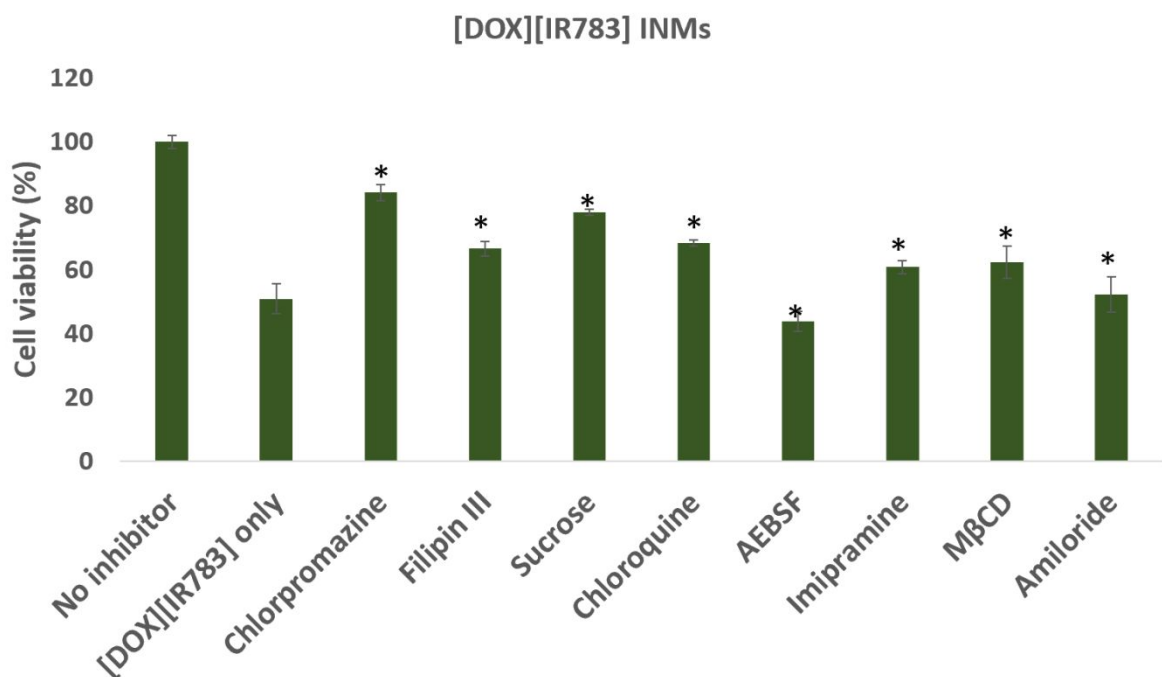

**Figure S10.** Cell viability of [DOX][IR783] INMs in MCF-7 cells in the presence of different endocytosis inhibitors pre-incubated for 2 hr at 37 °C prior to drug introduction for 24 hr. [DOX][IR783] INMs were introduced at 0.89  $\mu\text{M}$ .<sup>1</sup> The results are represented as mean  $\pm$  SD (n=3), statistically significant  $p \leq 0.05$  (\*) was evaluated using the student t-test.



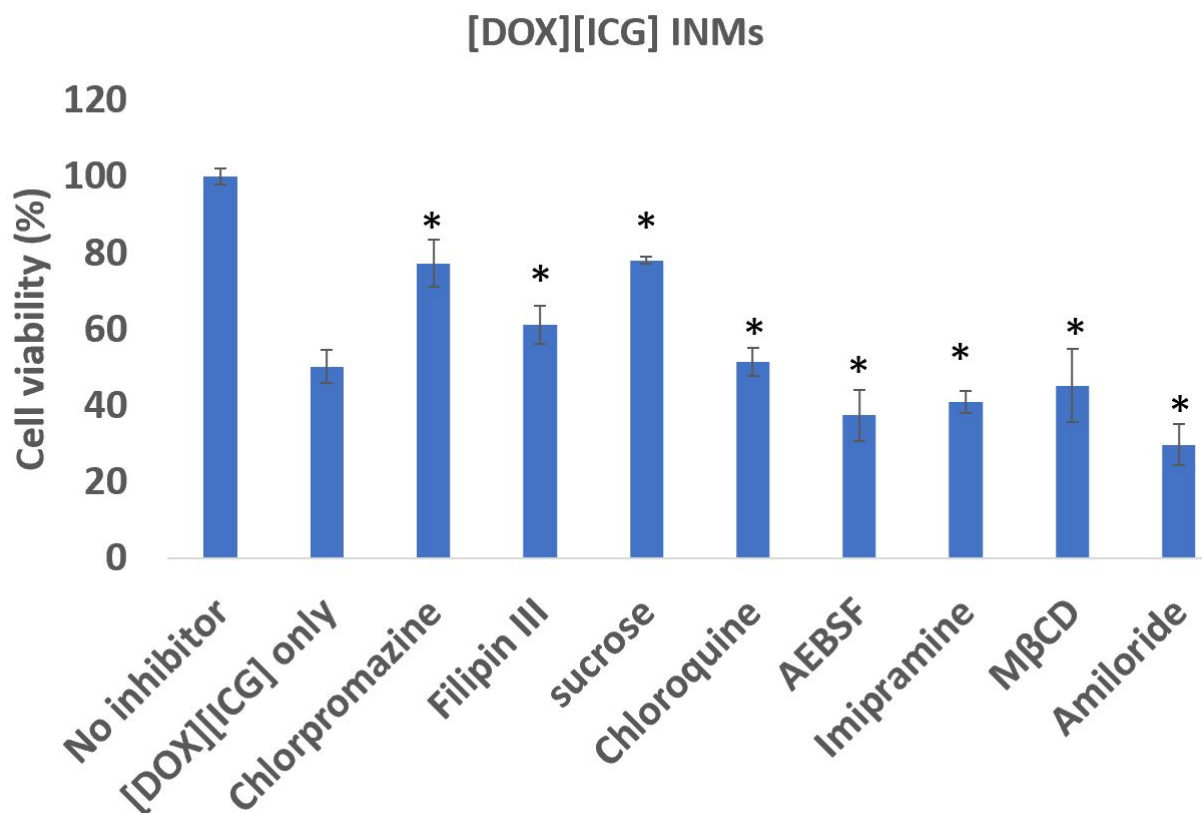

**Figure S11.** Cell viability of [DOX][ICG] INMs in MCF-7 cells in the presence of different endocytosis inhibitors pre-incubated for 2 hr at 37 °C prior to drug introduction for 24 hr. [DOX][ICG] INMs were introduced at 0.55  $\mu\text{M}$ .<sup>1</sup> The results are represented as mean  $\pm$  SD (n=3), statistically significant  $p \leq 0.05$  (\*) was evaluated using the student t-test.

## References

- (1) Bashiru, M.; Macchi, S.; Forson, M.; Khan, A.; Ishtiaq, A.; Oyebade, A.; Jalihal, A.; Ali, N.; Griffin, R. J.; Oyelere, A. K.; Hooshmand, N.; Siraj, N. Doxorubicin-Based Ionic Nanomedicines for Combined Chemo-Phototherapy of Cancer. *ACS Appl. Nano Mater.* **2024**, 7 (2), 2176–2189.  
<https://doi.org/10.1021/acsanm.3c05464>.
